# Supplementary material
Source: MDPI journal article supplement (https://www.mdpi.com/2072-4292/14/21/5507)
Supplement: s1 [file s1]

## Supplementary material

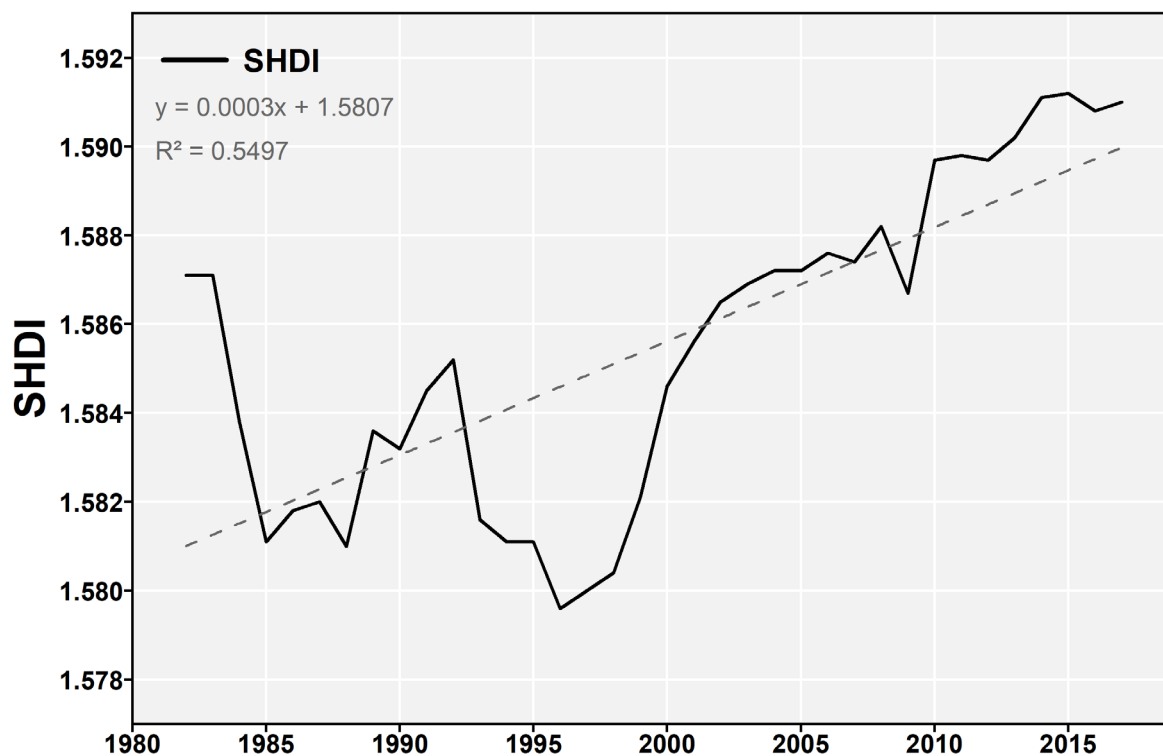

Figure S1. Changes of SHDI in Central Asia from 1982 to 2017.

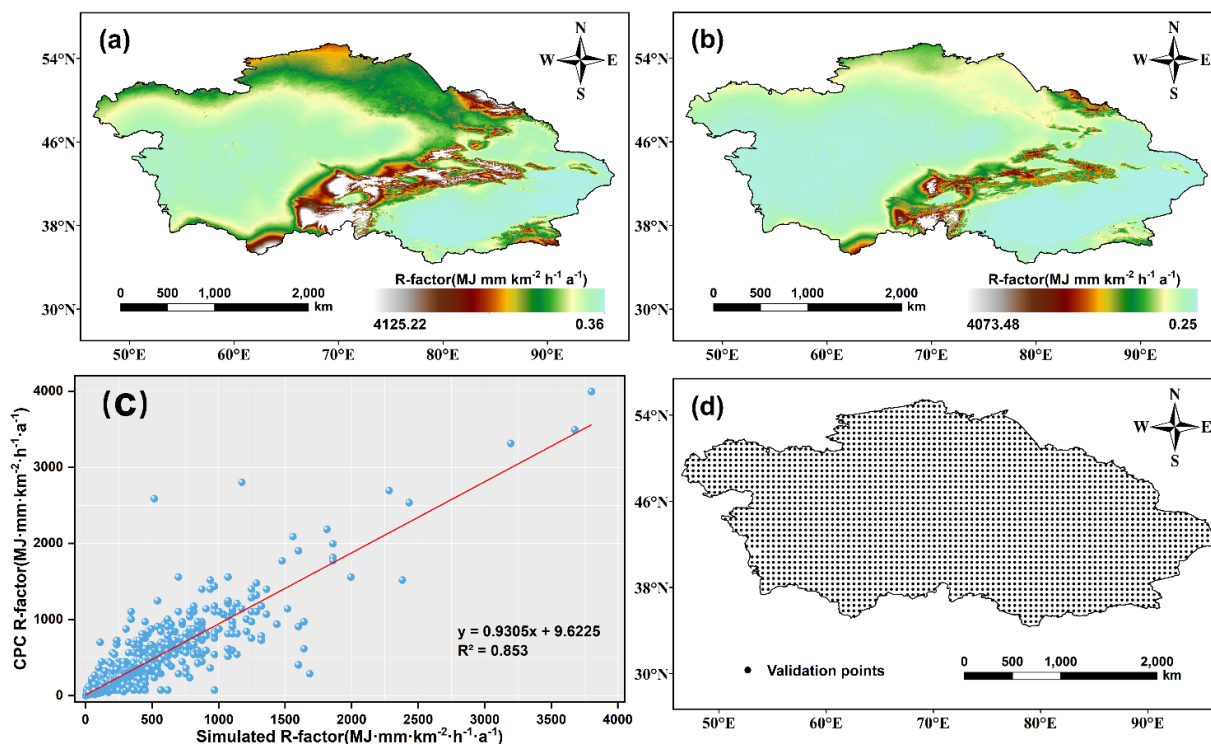

Figure S2. Validation of rainfall erosivity factor. (a) Our simulated rainfall erosivity factor. (b) Rainfall erosivity factor based on global site data released by Climate Prediction Center (CPC). (c) Fitted scatter plot of two rainfall erosivity

factors (a and b). (d) The point used to extract validation data.

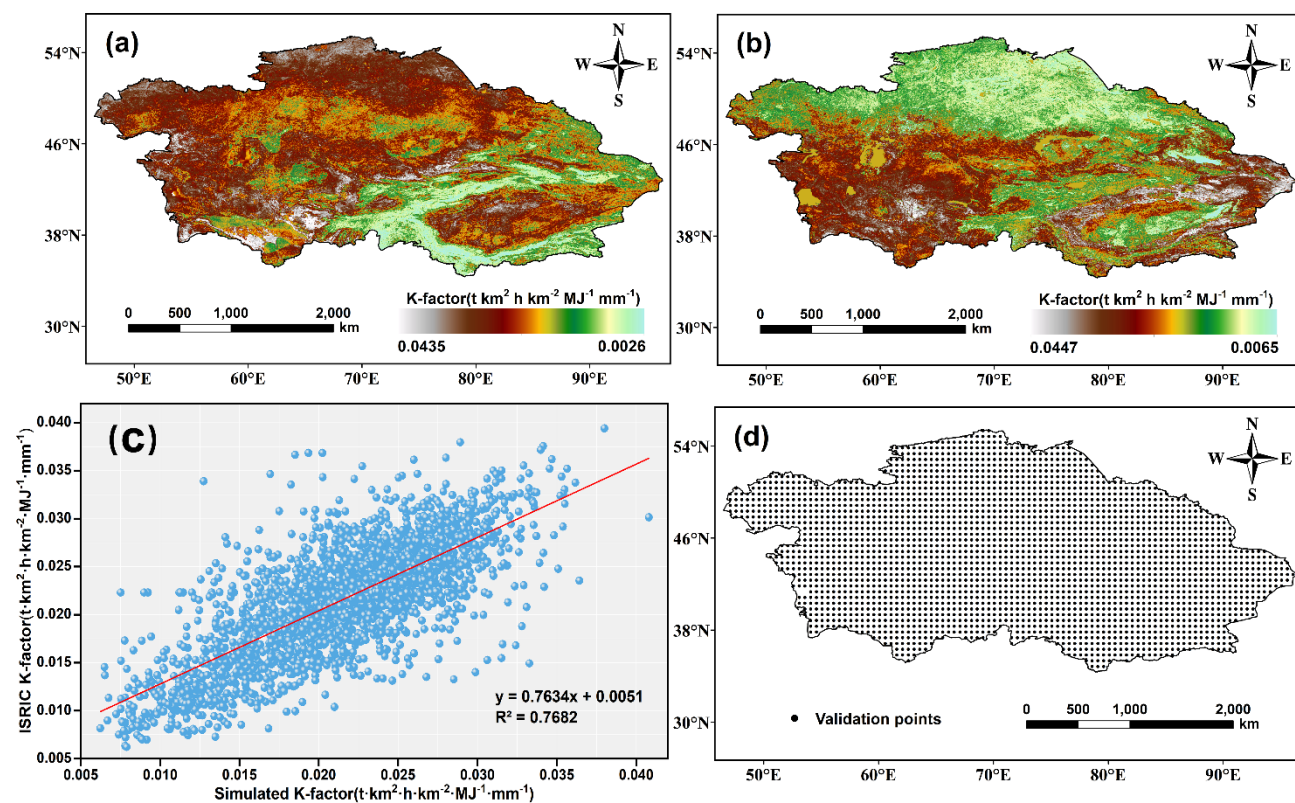

**Figure S3.** Validation of soil erodibility factor. (a) Our simulated soil erodibility factor. (b) Soil erodibility factor based on International Soil Reference and Information Centre (ISRIC). (c) Fitted scatter plot of two soil erodibility factors (a and b). (d) The point used to extract validation data.
